# Supplementary material for: Direct visualization of solid electrolyte interphase on Li4Ti5O12 by in situ AFM
Source: Royal Society of Chemistry journal article supplement (doi:10.1039/c6ra16208h), 2016-01-01
Supplement: c6ra16208h1.pdf [file c6ra16208h1.pdf]

## Direct Visualization of Solid Electrolyte Interphase on $\text{Li}_4\text{Ti}_5\text{O}_{12}$ by in-situ AFM

Shuwei Wang<sup>a,b</sup>, Kai Yang<sup>c</sup>, Fei Gao<sup>c</sup>, Deyu Wang<sup>a\*</sup> and Cai Shen<sup>a\*</sup>

---

<sup>a</sup> Ningbo Institute of Materials Technology & Engineering, Chinese Academy of Sciences, 1219 Zhongguan Road, Zhenhai District, Ningbo, Zhejiang, China. Fax: 86-574-87910728; Tel: 86-574-86682743;

Email: [shencai@nimte.ac.cn](mailto:shencai@nimte.ac.cn); [wangdy@nimte.ac.cn](mailto:wangdy@nimte.ac.cn)

---

<sup>b</sup> School of Materials Science and Engineering, Shanghai University, Shanghai, China, 200072

<sup>c</sup> China Electric Power Research Institute, State Grid Corporation of China Electronic Supplementary Information (ESI) available: [AFM image of electrode composites only Super P and PVDF, graphite, and height profiles of LTO surface]. See DOI: 10.1039/x0xx00000x

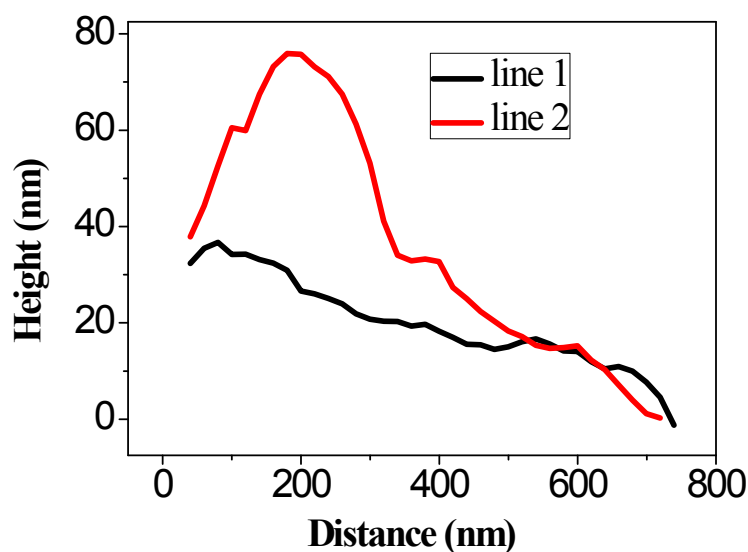

Figure S1. Line profiles of figure 8. Line 1 corresponds to the pristine LTO surface. Line 2 corresponds to the LTO surface after first CV.

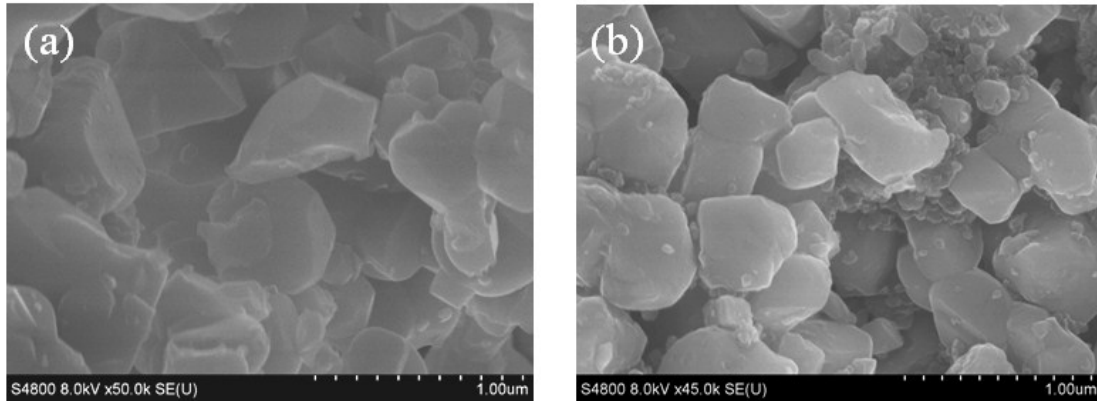

Figure S2. (a) SEM image of LTO powder; (b) LTO electrode
